# Supplementary material
Source: publisher figshare collection journal article supplement (https://frontiersin.figshare.com/ndownloader/files/25507379)
Supplement: Supplementary file 1 [file 25507379]

Supplementary Material

Supplementary Data - Channels that currently participate in the ScienceVlogs Brasil project

| Channel name | Channel name (English) | Link to the channel | Participated in the research (x = yes) |
| --- | --- | --- | --- |
| Boteco Behaviorista | Behaviorist Pub | <https://www.youtube.com/user/felipefrog> | x |
| Canal do Pirula | Pirula’s Channel | <https://www.youtube.com/user/Pirulla25> | x |
| Matemática Rio com Prof. Rafael Procópio | Rio Mathematics with Teacher Rafael Procópio | <https://www.youtube.com/user/matematicario> |  |
| Professor André Azevedo da Fonseca | Professor André Azevedo da Fonseca | <https://www.youtube.com/user/azevedodafonseca> | x |
| E-farsas | E-fakes | <https://www.youtube.com/user/Efarsas> | x |
| iBio Movies | iBio Movies | <https://www.youtube.com/user/ibiomovies> |  |
| FRANK JAAVA | FRANK JAAVA | <https://www.youtube.com/user/adrianofacioli> | x |
| Papo de primata | Primate talk | <https://www.youtube.com/user/papodeprimata> | x |
| Ciência todo dia | Science every day | <https://www.youtube.com/user/CienciaTodoDia> | x |
| Quer Que Desenhe | Do you want me to draw it | <https://www.youtube.com/channel/UCYP-0Y1i-AXhT1aj10t5Qgg> |  |
| Canal do Schwarza* | Schwarza’s Channel | <https://www.youtube.com/user/poligonautas> |  |
| Minuto da Terra | Minute of the Earth | <https://www.youtube.com/user/MinutoDaTerra> | x |
| Site Arqueologia Egípcia | Egyptian Archeology Website | <https://www.youtube.com/user/arqueologiaegipcia> | x |
| Eu, ciência | Me, science | <https://www.youtube.com/user/EuCiencia> |  |
| Alimente o cérebro | Feed the brain | <https://www.youtube.com/user/canaldocerebro/featured> | x |
| Colecionadores de Ossos | Bone Collectors | <https://www.youtube.com/user/ColecionadoresOssos> | x |
| Peixe Babel | Babel Fish | <https://www.youtube.com/user/CanalPeixeBabel/featured> | x |
| Mensageiro Sideral | Outer Messenger | <https://www.youtube.com/channel/UCoRwVRrzVq3qTw7GqOEfH6Q> |  |
| Xadrez Verbal | Verbal Chess | <https://www.youtube.com/user/xadrezverbal> |  |
| Minutos Psíquicos | Psychological Minutes | <https://www.youtube.com/user/minutospsiquicos> |  |
| Canal do Slow | Slow’s Channel | <https://www.youtube.com/user/estevaoslow> | x |
| Primata Falante | Speaking Primate | https://www.youtube.com/user/mrprimatafalante |  |
| Jornal Ciensacional | Sciensational Newspaper | <https://www.youtube.com/user/jornalciensacional> | x |
| Leitura ObrigaHISTÓRIA* | Mandastory Readings | <https://www.youtube.com/channel/UCtMjnvODdK1Gwy8psW3dzrg> |  |
| Space Today | Space Today | <https://www.youtube.com/channel/UC_Fk7hHbl7vv_7K8tYqJd5A> |  |
| Papo de biólogo | Biologist’s talk | <https://www.youtube.com/user/papodebiologo> |  |
| Zoa | Zoa | <https://www.youtube.com/channel/UClXvx3XjUHM5z_SvrfTNu3A> | x |
| Universo Racionalista | Rationalist Universe | <https://www.youtube.com/channel/UCX2X5RCvKCf-rVHop2WiEgQ> |  |
| Terra Negra | Black Earth | https://www.youtube.com/channel/UCbQ4CkszFFUju5XtFid-XWQ | x |
| Bio’s Fera | Bio’s Fera | https://www.youtube.com/channel/UCAggIglRD-FKW4_q9FK2zEw |  |
| Ponto em comum | Point in Common | <https://www.youtube.com/channel/UCGo3vjM2Ll3XujL-zYT5SMg> | x |
| Olá Ciência | Hello Science | <https://www.youtube.com/channel/UCrSM1UV_KLAdTzgxyxl3POw> | x |
| A Matemaníaca por Júlia Jaccoud | The Mathemaniac by Júlia Jaccoud | <https://www.youtube.com/channel/UCz4Zuqtj9fokXH68gZJmCdA> | x |
| O Físico Turista* | The Tourist Physicist | <https://www.youtube.com/channel/UCV8ZgEjwdNnZC4_FJtdDFCg> |  |
| Cura Quântica | Quantum Cure | <https://www.youtube.com/channel/UCP2nmeXrkrrPBBc8CqIb8Bw> | x |
| Blablalogia | Blablalogy | <https://www.youtube.com/channel/UC3Ooj_iDWELBumIEDejyNHQ> | x |
| Reinado José Lopes | Reinado José Lopes | https://www.youtube.com/channel/UCoB9jZ5E60HraX36xHx6ZQQ |  |
| Caio na Aula* | Caio in Class | <https://www.youtube.com/channel/UCLEQMN2aaUD9VfBVPxG0IOg> |  |
| Café e Ciência | Coffee and Science | <https://www.youtube.com/channel/UCdFNjuQaNP4oRbWPPwZE7Lw> | x |
| Dragões de garagem | Garage Dragons | <https://www.youtube.com/channel/UCbrt8UdV49AqgT7-VaXmlwQ> | x |
| ScienceVlogs Brasil | ScienceVlogs Brasil (official channel) | <https://www.youtube.com/channel/UCqiD87j08pe5NYPZ-ncZw2w> |  |
| Disperciência | Disperscience | <https://www.youtube.com/channel/UCUgarxqakK33XeFA4nHG2HA> | x |
| Delta T – Os super lentos | Delta T – The super slow | <https://www.youtube.com/channel/UCXb2997DggM-xOwnDs42PaQ> | x |
| Mimimidias* | Mimimedia | https://www.youtube.com/channel/UCg0CfiR_iKjBOYgeHps17BA |  |
| ComCiência Corporal* | Body Awareness | <https://www.youtube.com/channel/UCM1gu2yWlpvzzIyRSB8PMBA> |  |
| AstroTubers* | AstroTubers | <https://www.youtube.com/channel/UCGYBY4KaFYmkEKAGLL07BXw> |  |
| Manual do Mundo* | World Handbook | <https://www.youtube.com/channel/UCKHhA5hN2UohhFDfNXB_cvQ> |  |
| Drauzio Varella* | Drauzio Varella | https://www.youtube.com/channel/UC9zqTTVeClpqMQ5CLuJdWtw |  |
| Canal USP* | USP Channel | https://www.youtube.com/channel/UCN1ihdoKXeixzYi7Hyp4WwQ |  |
| The Mingau* | The Porridge | <https://www.youtube.com/channel/UCR-Qn5E3J6qaQOusRJOHhpw> |  |
| Marcelo Gleiser* | Marcelo Gleiser | <https://www.youtube.com/channel/UC7Ibd8DnwTwDN7oBmx7eFfQ/videos> |  |
| Laboratório 2000* | 2000 Lab | <https://www.youtube.com/channel/UC99ocVKjV8mth0CqTYbRbGQ> |  |
| Versada by Vane Costa* | Versed by Vane Costa | https://www.youtube.com/channel/UCkJuSt0fxwaLO5D6rr1QA2A |  |
| Mural Cientifico* | Scientific Wall | https://www.youtube.com/channel/UC0ABb9XMjG8M_rmxbxtW6Qw |  |
| Nunca vi um cientista* | I’ve never seen a cientist | https://www.youtube.com/channel/UCdKJlY5eAoSumIlcOcYxIGg |  |
| Tempo e Clima Brasil* | Weather and Climate Brazil | <https://www.youtube.com/channel/UC2ndKvRW06pM5KY06knv_Qg> |  |
| Física Marginal* | Marginal Physics | https://www.youtube.com/channel/UCMY5haswl281XIIEOrrxl-w |  |
| Mas Afinal* | But, After all | https://www.youtube.com/channel/UCL6ygBKtuMoMlDp_4ikvKrg |  |
| Universo Narrado* | Narrated Universe | <https://www.youtube.com/channel/UCcdK7fNDtCuiERTzTZdWY7w> |  |

All the channels that have the * signal were added to the SVBr project after we collect data for our research.
